# Supplementary material for: Structural evolution of two-dimensional silicates using a “bond-switching” algorithm
Source: Royal Society of Chemistry journal article supplement (doi:10.1039/d0nr07623f), 2020-12-08
Supplement: d0nr07623f1.pdf [file d0nr07623f1.pdf]

## Supporting Information: Structural Evolution of Two-Dimensional Silicates Using a “Bond-Switching” Algorithm

Alejandro M. Boscoboinik<sup>1</sup>, Sergio J. Manzi<sup>2,\*</sup>, Víctor D. Pereyra<sup>3</sup>, Walter L. Mas<sup>4</sup>, Jorge Anibal Boscoboinik<sup>5,\*</sup>

<sup>1</sup> Department of Chemistry and Biochemistry and Laboratory for Surface Studies, University of Wisconsin–Milwaukee, Milwaukee, Wisconsin 53211, United States.

<sup>2</sup> Departamento de Física, Instituto de Física Aplicada (INFAP) - CONICET, Universidad Nacional de San Luis, Chacabuco 917, San Luis 5700, Argentina.

<sup>3</sup> Departamento de Física, Instituto de Matemática Aplicada (IMASL) - CONICET, Universidad Nacional de San Luis, Chacabuco 917, San Luis 5700, Argentina

<sup>4</sup> Departamento de Matemática, Universidad Nacional de San Luis, Chacabuco 917, San Luis 5700, Argentina.

<sup>5</sup> Center for Functional Nanomaterials, Brookhaven National Laboratory, Upton, New York 11973-5000, United States.

Corresponding authors: [smanzi@unsl.edu.ar](mailto:smanzi@unsl.edu.ar), [jboscoboinik@bnl.gov](mailto:jboscoboinik@bnl.gov)

SI

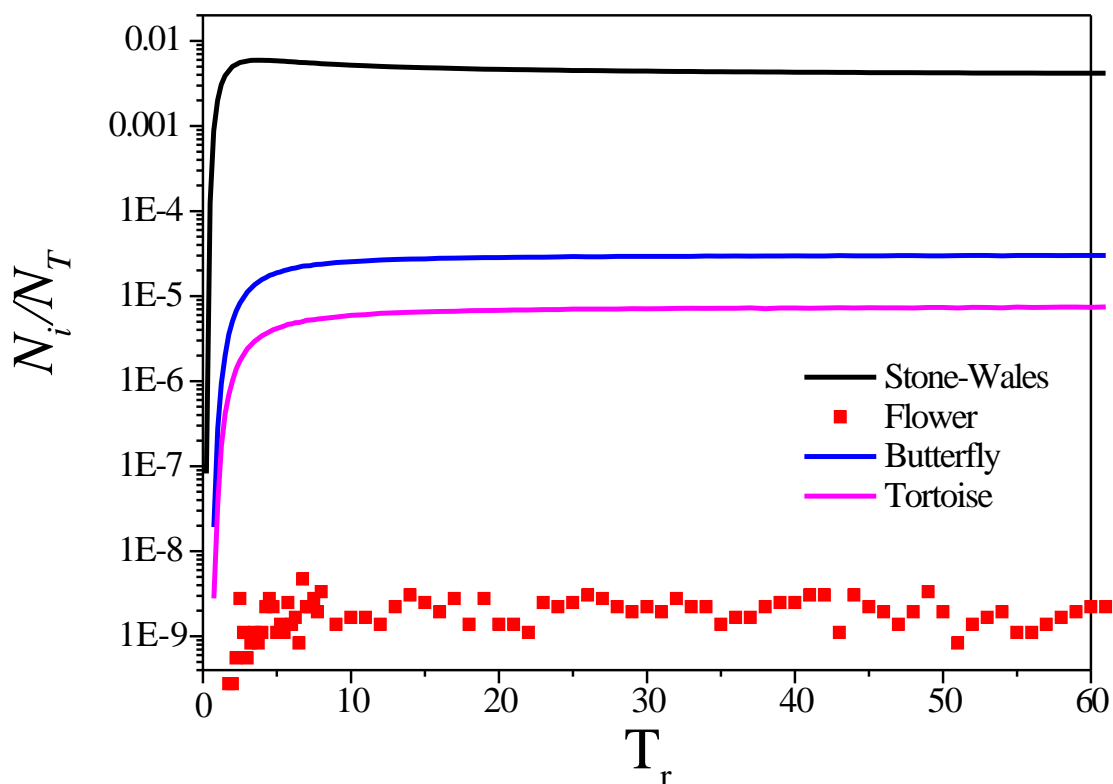

**Figure S1:** Evolution of the population of structures shown in Figure 6 as a function of relative temperature  $T_r$ . The population is normalized to the total number of rings in the system for a lattice of size  $L = 120$ .
